# Supplementary material for: Incorporation of a Pd catalyst at the fuel electrode of a thin-film-based solid oxide cell by multi-layer deposition and its impact on low-temperature co-electrolysis
Source: Royal Society of Chemistry journal article supplement (doi:10.1039/c7ta00499k), 2017-01-01
Supplement: c7ta00499k1.pdf [file c7ta00499k1.pdf]

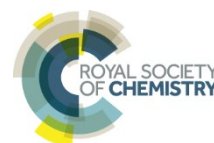

SUPPLEMENTARY INFORMATION

**Incorporation of Pd catalyst at fuel electrode of thin-film-based solid oxide cell by multi-layer deposition and its impact on low-temperature co-electrolysis**

Cam-Anh Thieu,<sup>ab</sup> Jongsup Hong,<sup>a</sup> Hyoungchul Kim,<sup>ab</sup> Kyung Joong Yoon,<sup>ab</sup> Jong-Ho Lee,<sup>ab</sup> Byung-Kook Kim<sup>a</sup> and Ji-Won Son<sup>ab\*</sup>

<sup>a</sup>. High-temperature Energy Materials Research Center, Korea Institute of Science and Technology (KIST), 14-5 Hwarang-ro, Seongbuk-gu, Seoul 136-791, Republic of Korea.

<sup>b</sup>. Nanomaterials Science and Engineering, Korea University of Science and Technology (UST), 217 Gajeong-ro, Yuseong-gu, Daejeon 305-333, Korea.

\* **Corresponding authors:** J.-W. Son (jwson@kist.re.kr)

**Keywords:** low-temperature co-electrolysis, Pd incorporation, fuel electrode functional layer, thin film-based solid oxide cell

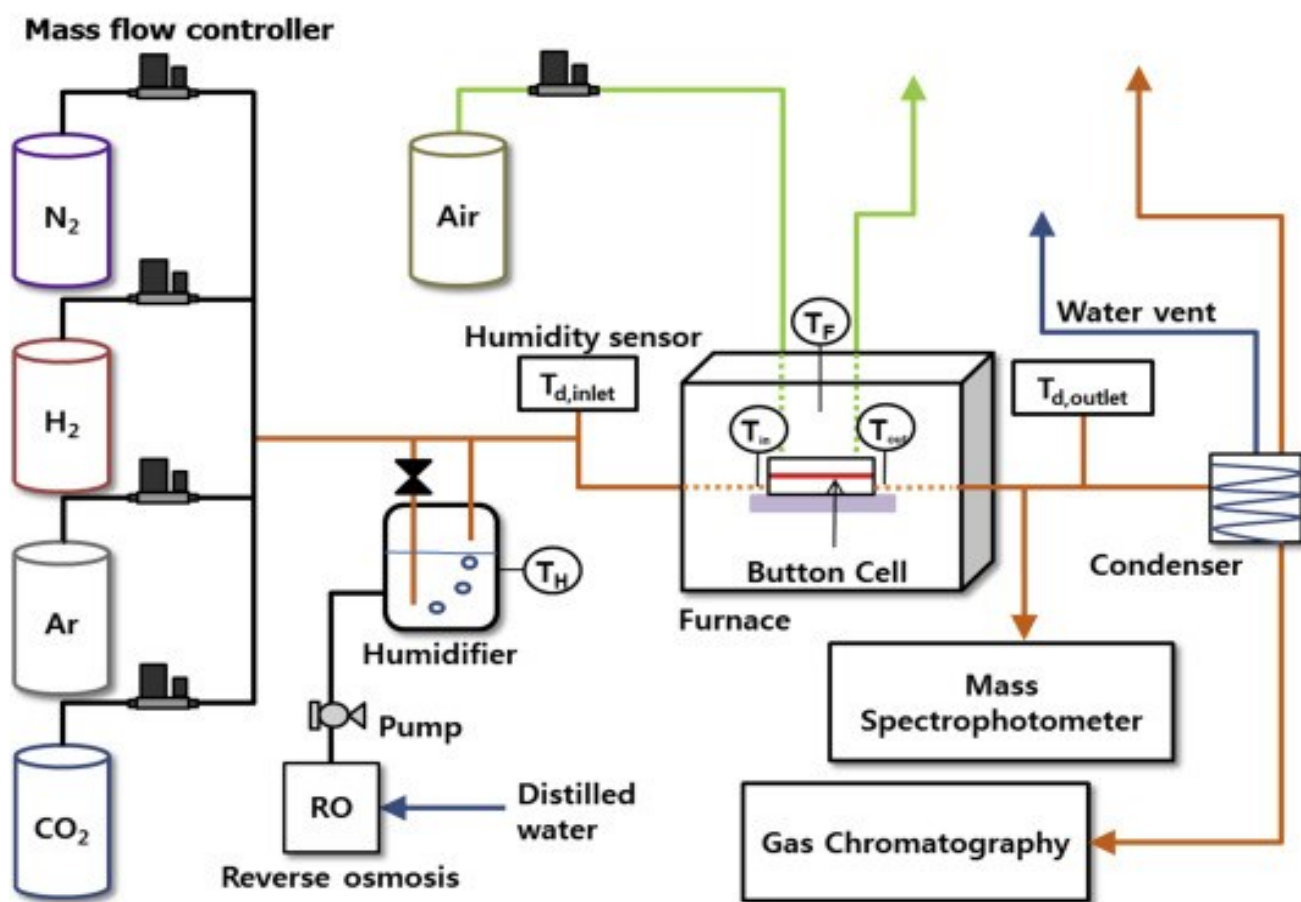

**Fig. S1.** Schematic of Co-EC testing system.<sup>40</sup> (Reprinted by permission from *J. Power Sources*, **280**, 630. Copyright (2015) Elsevier).

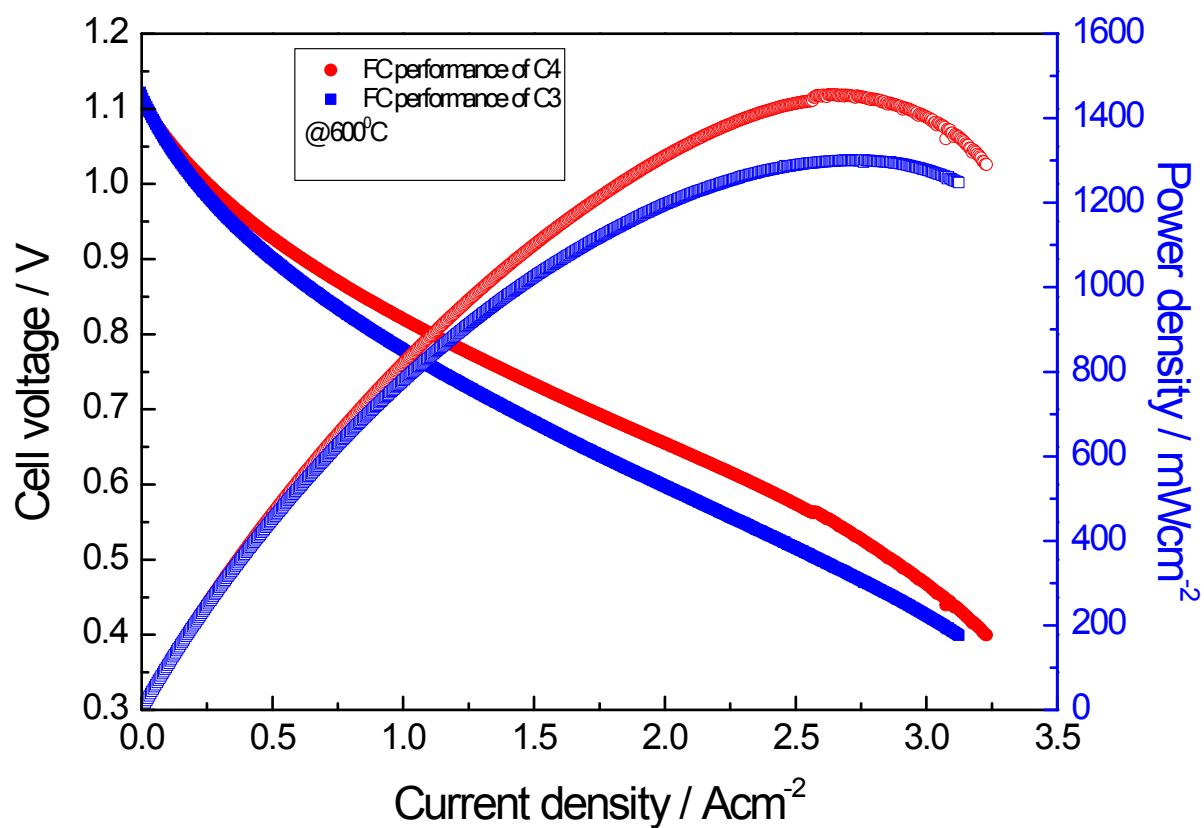

Fig. S2. I-V-P curves at 600 °C in fuel cell mode of TF-SOCs with C3 and C4 FEFL configurations

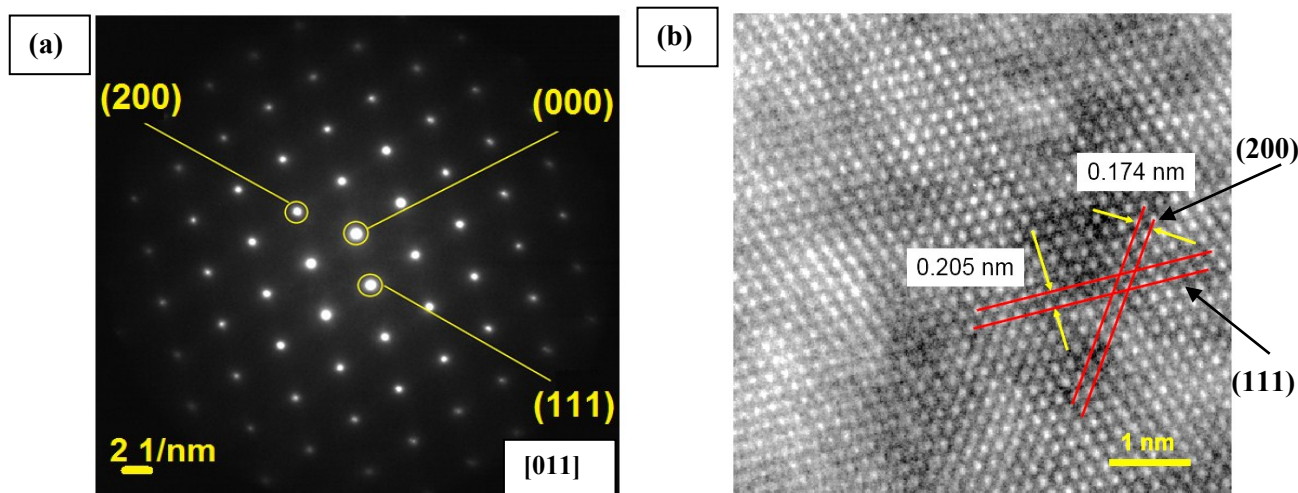

Fig. S3. (a) A SAED pattern and (b) HR-TEM image showing the lattice images of the Pd-Ni alloy

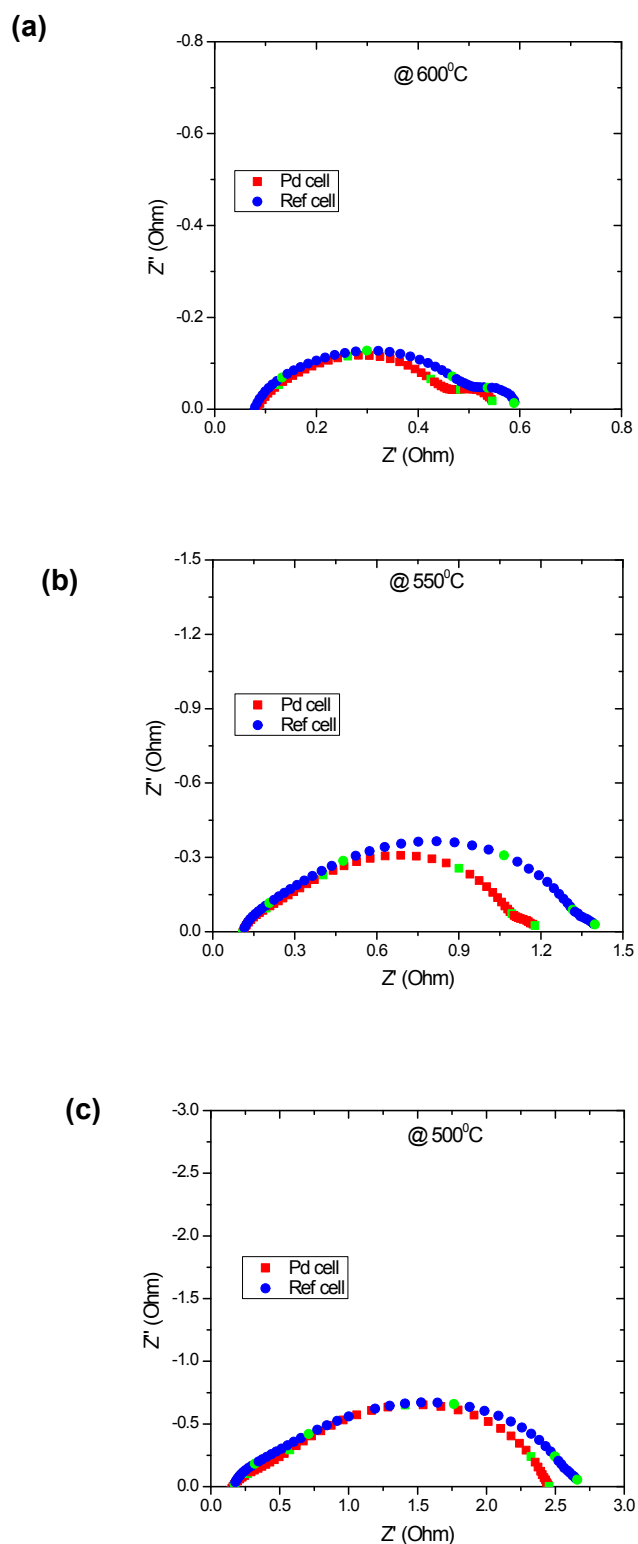

**Fig. S4.** Nyquist plots of 2 cells measured during LT-Co-EC testing at OCV at (a) 600 °C, (b) 550 °C and (c) 500 °C

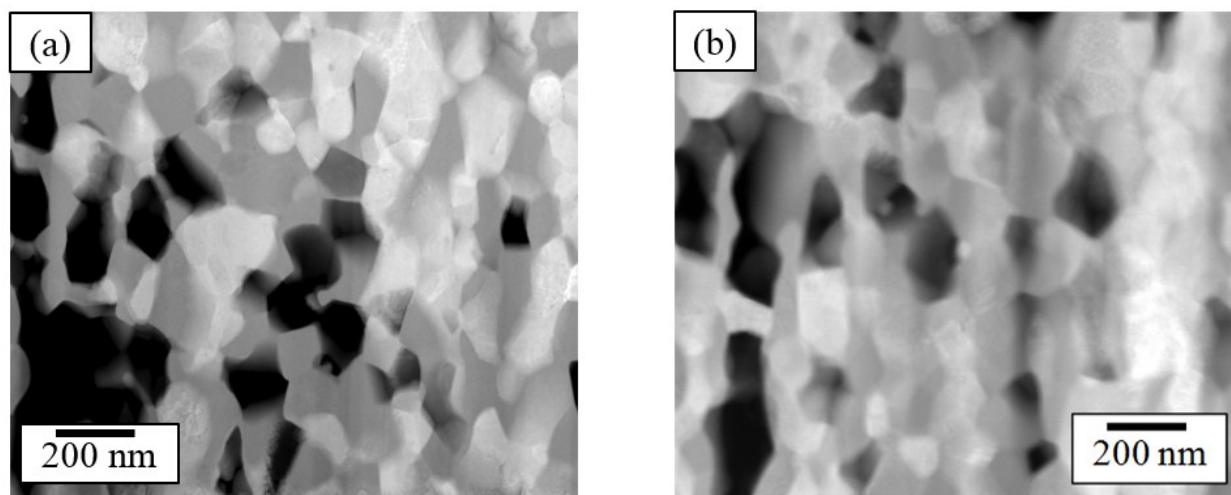

**Fig. S5.** Morphology of (a) Pd-cell and (b) Ref-cell in fuel electrode functional layer (FEFL).<sup>49</sup> (Fig. S5. (b) is reproduced from permission of *Electrochem. Solid-State Lett*, **14**, B26. Copyright (2010) The Electrochemical Society.)
